1 **Article Summary Line:** Genomic and epidemiological characterization of the ongoing Chikungunya  
2 virus epidemic in Paraguay

3

4 **Running Title:** Genomic monitoring of CHIKV in Paraguay

5

6 **Rapid epidemic expansion of chikungunya virus-ECSA lineage in Paraguay**

7

8 Marta Giovanetti<sup>1,2^\*</sup>, Cynthia Vazquez<sup>3^</sup>, Mauricio Lima<sup>1,4^</sup>, Emerson Castro<sup>1,4^</sup>, Analia Rojas<sup>3</sup>,  
9 Andrea Gomez de la Fuente<sup>3</sup>, Carolina Aquino<sup>3</sup>, Cesar Cantero<sup>3</sup>, Fatima Fleitas<sup>3</sup>, Juan Torales<sup>3</sup>, Julio  
10 Barrios<sup>3</sup>, Maria Jose Ortega<sup>3</sup>, Maria Liz Gamarra<sup>3</sup>, Shirley Villalba<sup>3</sup>, Tania Alfonso<sup>3</sup>, Joilson  
11 Xavier<sup>1,5</sup>, Talita Adelino<sup>4</sup>, Hegger Fritsch<sup>1,5</sup>, Felipe C. M. Iani<sup>4</sup>, Glauco Carvalho Pereira<sup>4</sup>, Carla de  
12 Oliveira<sup>6</sup>, Gabriel Schuab<sup>6</sup>, Evandra Strazza Rodrigues<sup>7</sup>, Simone Kashima<sup>7</sup>, Juliana Leite<sup>8</sup>, Lionel  
13 Gresh<sup>8</sup>, Leticia Franco<sup>8</sup>, Houriiyah Tegally<sup>9,10</sup>, Wesley C. Van Voorhis<sup>11</sup>, Richard Lessels<sup>10</sup>, Ana  
14 Maria Bispo de Filippis<sup>6</sup>, Andrea Ojeda<sup>12</sup>, Guillermo Sequera<sup>12</sup>, Romeo Montoya<sup>13</sup>, Edward C.  
15 Holmes<sup>14</sup>, Tulio de Oliveira<sup>9,10</sup>, Jairo Mendez Rico<sup>8</sup>, José Lourenço<sup>15\*</sup>, Vagner Fonseca<sup>16</sup>, Luiz Carlos  
16 Junior Alcantara<sup>1\*</sup>

17

18 1-Instituto Rene Rachou, Fundação Oswaldo Cruz, Minas Gerais, Brazil.

19 2-Sciences and Technologies for Sustainable Development and One Health, University of Campus  
20 Bio-Medico, Rome, Italy.

21 3-Laboratorio Central de Salud Pública, Asunción, Paraguay.

22 4-Laboratorio Central de Saúde Pública do Estado de Minas Gerais, Fundação Ezequiel Dias, Brazil.

23 5-Instituto de Ciências Biológicas, Universidade Federal de Minas Gerais, Brazil.

24 6-Laboratório de Arbovírus e Vírus Hemorrágicos (LARBOH), Instituto Oswaldo Cruz, Fiocruz, Rio  
25 de Janeiro, Brazil.

26 7-University of São Paulo, Ribeirão Preto Medical School, Blood Center of Ribeirão Preto, Ribeirão  
27 Preto, SP, Brazil.

28 8-Infectious Hazards Management, Health Emergencies Department (PHE), Pan American Health  
29 Organization / World Health Organization (PAHO/WHO), Washington DC, USA.

30 9-Centre for Epidemic Response and Innovation (CERI), School of Data Science and Computational  
31 Thinking, Stellenbosch University, Stellenbosch 7600, South Africa.

32 10-KwaZulu-Natal Research Innovation and Sequencing Platform (KRISP), Nelson R Mandela  
33 School of Medicine, University of KwaZulu-Natal, Durban 4001, South Africa.

34 11-Center for Emerging and Re-emerging Infectious Diseases, University of Washington, USA

35 12-Dirección General de Vigilancia de la Salud, Asunción, Paraguay.

36 13-Enfermedades Trasmisibles y Determinantes Ambientales de la Salud CDE/HA/PHE,  
37 Organización Panamericana de la Salud / Organización Mundial de la Salud (OPS/OMS), Asuncion,  
38 Paraguay.

39 14-Marie Bashir Institute for Infectious Diseases and Biosecurity, School of Life and Environmental  
40 Sciences and School of Medical Sciences, University of Sydney, Sydney, NSW, Australia.

41 15-Biosystems and Integrative Sciences Institute, Faculty of Sciences, University of Lisbon, Lisbon,  
42 1749-016, Portugal.

43 16-Coordenação de Vigilância, Preparação e Resposta à Emergências e Desastres (PHE), Organização  
44 Pan-Americana da Saúde / Organização Mundial da Saúde (OPAS/OMS), Brasilia DF, Brazil.

45

46 **Keywords:** Chikungunya virus, ECSA lineage, genomic monitoring, Paraguay, South America

47

48 ^Denotes equal contribution

49

50 \*Correspondence to: [luiz.alcantara@fiocruz.br](mailto:luiz.alcantara@fiocruz.br), [giovanettimarta@gmail.com](mailto:giovanettimarta@gmail.com), [JMLourenco@fc.ul.pt](mailto:JMLourenco@fc.ul.pt)

51

## 52 Abstract

53 The spread of vector-borne viruses, such as CHIKV, is a significant public health concern in the  
54 Americas, with over 120,000 cases and 51 deaths in 2023, of which 46 occurred in Paraguay. Using a

55 suite of genomic, phylodynamic, and epidemiological techniques, we characterized the ongoing large  
56 CHIKV epidemic in Paraguay.

57

58

## 59 **Text**

60 Chikungunya is a mosquito-borne disease caused by the chikungunya virus (CHIKV), a single-  
61 stranded positive-sense RNA virus belonging to the *Togaviridae* family (1), which is transmitted to  
62 humans through the bite of infected *Aedes* mosquitoes. Classically, it is an acute self-limiting illness  
63 characterized by fever and severe joint pain, although persistent or relapsing joint pain can occur (1).  
64 Atypical and severe manifestations (including meningoencephalitis) have been reported, and death is  
65 usually associated with older ages and other underlying diseases. Mother-to-child transmission of  
66 CHIKV does occur and neonatal disease can be severe, with neurological, myocardial, or  
67 haemorrhagic disease (1). CHIKV can be classified into four distinct genotypes: the West African; the  
68 East/Central/South African (ECSA); the Asian, and the Indian Ocean lineage (IOL) (2,3). The first  
69 imported case of CHIKV in Paraguay was detected in June 2014, in a patient from the Dominican  
70 Republic (4). Here, using a suite of on-site genomic monitoring, phylodynamic and epidemiological  
71 approaches we characterize the large-scale and ongoing 2022-2023 CHIKV epidemic in Paraguay.

72

## 73 *The Study*

74 We partnered with the Pan-American Health Organization (PAHO) to perform on-site genomic  
75 surveillance at the Laboratorio Central de Salud Pública in Asunción, Paraguay. From March 11 to  
76 17, 2023, a team of molecular biologists from Brazil and Paraguay worked with a set of selected  
77 samples (based on cycle threshold - Ct  $\leq 35$  and availability of epidemiological metadata, generating  
78 179 viral genomes (deposited in GenBank, accession number OQ775394-OQ775567 and OQ567722-  
79 OQ567725). Sequencing was by Nanopore technology (5). With these data in hand, we estimated  
80 phylogenetic trees to explore the evolutionary and epidemiological relationship of CHIKV in

81 Paraguay to those of other sequences of this viral genotype sampled globally. Accordingly, we  
82 retrieved 715 CHIKV-ECSA genome sequences with associated lineage date and country of  
83 collection from GenBank, collected up to March 30, 2023. The relevant methods are fully described  
84 in Supplementary Material.

85 Since the first autochthonous infections in Paraguay in 2015, CHIKV has been detected in the country  
86 every year (**Figure S1A**). Based on reported suspected CHIKV infections, the country has so far  
87 experienced four epidemic waves in 2015, 2016, 2018 and 2023, all associated with the summer  
88 months (**Figure S1A**). Between October 2, 2022, and April 10, 2023, a total of 118,179 suspected and  
89 confirmed infections have been already reported, including 3,510 hospitalized cases, and 46 deaths (4,  
90 6). Neonates have accounted for 0.3% (n=162) of these cases and 8 deaths. In addition, 294 suspected  
91 cases of acute meningoencephalitis have been reported, 125 (43%) of which have been attributed to  
92 CHIKV (5, 6). While yearly minimum temperatures across Paraguay have remained stable over the  
93 past 40 years, we noted that mean and maximum yearly temperatures have been steadily increasing  
94 over this period, with the rapid and large resurgence of CHIKV in 2022 coinciding with the highest  
95 mean temperatures ever reported (**Figure 1A**). Before 2022, confirmed infections were restricted to  
96 the Central, Paraguari, and Amambay districts, with the Central district dominating the reports  
97 (**Figure S1B**). After viral resurgence in 2022, confirmed infections have been reported in all districts  
98 (**Figure S1C**).

99 A total of 179 RT-qPCR positive samples for CHIKV were screened. All contained sufficient DNA ( $\geq$   
100 2 ng/ $\mu$ L) to proceed to library preparation, and their PCR Ct had a mean value of 21 (range: 9 to 34)  
101 (**Table S1**). The samples had a good spatial representation of southern Paraguay (10 out of 17  
102 districts) (**Figure 1B**) including several of the districts with highest historical counts of CHIKV  
103 infections (**Figure S1B-D**) and captured both the out- and in-season periods of transmission (autumn  
104 and early winter 2022 and summer 2023, **Figure 1C**). Analyzing sample sequence coverage versus Ct  
105 revealed an average coverage of 94% among samples, and a Ct of 28 below which average coverage  
106 of  $\geq$ 90% was achieved (**Figure S2**). Most genomes (87%) were obtained from serum samples, and  
107 the rest from cerebrospinal fluid (CSF), while 54% were from females, and the mean age was 41

108 (range 26 days to 95) (**Table S1**). Most genomes were from CHIKV infection outcomes defined as  
109 outpatients (58%), followed by fatal (18%), intensive care unit (ICU, 17%) and inpatient (7%)  
110 infections (**Figure 1D** and **Supplementary Material** for definitions). Compared with an outpatient  
111 outcome, there was a clear association of fatal outcomes with older age-groups (**Figure 1D**). The  
112 same comparison with outcomes requiring medical attention (ICU, inpatients) was not statistically  
113 significant (**Figure 1D**). This latter observation contrasted the common notion that CHIKV  
114 symptomatic infections are more frequent in older age-groups (7).

115 To determine the dynamics of the CHIKV-ECSA in Paraguay, we performed phylodynamic analysis  
116 of a data set comprising 715 available representative genomes combined with the viruses sequenced  
117 in this study (n=179, collected between 06 April 2022 to 10 March 2023) (**Figure 1E**). A date-  
118 stamped phylogeny indicated that all the novel isolates formed a single large well-supported  
119 monophyletic group – denoted Paraguay clade 2 (PY2) - within the CHIKV-ECSA American clade.  
120 This strongly suggests that the 2022-2023 epidemic was not related to Brazilian cross-border  
121 transmission as in the past (8) (**Figure 1E, Clade PY I**), but was more likely the result of continual  
122 transmission within Paraguay over a period of 11 months of a viral strain that was introduced in the  
123 region in early 2022 (**Figure 1E, Clade 2, Figure 2C**).

124 To investigate the evolution of the PY clade 2 in more detail, we used a smaller data set (n=179)  
125 representing this virus clade in isolation. There was a relatively strong correlation between the  
126 sampling date and the root-to-tip genetic divergence in this data set ( $r^2=0.40$ , coefficient  
127 correlation=0.60), indicating relatively clock-like virus evolution (**Figure 2B**). A phylogeographic  
128 analysis of PY2 allowed the reconstruction of viral movements among different districts in Paraguay  
129 (**Figure 2C**) and suggested a mean time of origin in late-March 2022 (95% highest posterior density  
130 (HPD): 25 March 2022 to 5 April 2022). Viruses from this clade spread multiple times from the  
131 Midwestern District (Distrito Capital and Central regions) towards the Southeast (Itapúa) and to the  
132 Midwest, as indicated by virus sequences from the Presidente Hayes and the Cordillera regions  
133 (**Figure 2C**). Transmission dynamics roughly followed patterns of population density, moving most

134 often between the most populous urban localities (**Figure 1B, 2A, 2C**). Since it is recognized that not  
135 only non-synonymous, but also synonymous mutations can lead to changes in viral RNA (9, 10),  
136 affecting splicing, stability, translation or co-translational protein folding, additional studies will be  
137 necessary to determine the potential impact of these mutations on structure and function, and thus on  
138 viral pathogenesis and fitness.

### 139 **Conclusions**

140 This study highlights the resurgence of CHIKV-ECSA in Paraguay in 2022-2023. Our findings  
141 provide evidence of lineage persistence in the country over a period of 11 months preceding  
142 resurgence and present the notable coincidence of virus resurgence alongside the highest mean  
143 temperatures ever recorded in Paraguay. These two factors, together with the presence of the vectors  
144 and a large proportion of the population susceptible to CHIKV, likely generated an ideal scenario for  
145 the observed fast and large CHIKV epidemic wave that started at the end of 2022. To date, the  
146 epidemic has been associated with a high frequency of severe symptoms and fatal outcomes in older  
147 age-groups. Given the association of the ongoing resurgence with a specific lineage of CHIKV-ECSA  
148 with two synonymous changes in nonstructural proteins (NSP3 and NSP4), and the uncertainty of  
149 how the ongoing epidemic will unfold, genomic surveillance should remain active to track its real-  
150 time evolution and spatial spread, in turn contributing to public health risk assessments in Paraguay  
151 and its South American neighbors.

152

### 153 **Ethics statement**

154 This project was reviewed and approved by the Pan American Health Organization Ethics Review  
155 Committee (PAHOERC) (Ref. No. PAHO-2016-08-0029) and by the Paraguayan Ministry of Public  
156 Health and Social Welfare (MSPyBS/ S.G. no. 0944/18). The samples used in this study were de-  
157 identified residual samples from the routine diagnosis of arboviruses in the Paraguayan public health  
158 laboratory, which is part of the public network within the Paraguayan Ministry of Health.

159

### 160 **Biographical sketch**

161 Dr. Giovanetti is a Visiting Researcher at the René Rachou Institute, Fiocruz Minas Gerais, Southeast  
162 Brazil and at the University Campus Bio-Medico in Rome, Italy. Her research focuses on  
163 investigating the patterns of gene flow in pathogen populations, focusing in phylogenetics and  
164 phylogeography as tools to recreate and understand the determinants of viral outbreaks and how this  
165 information can be translated into public policy recommendations.

166

167

## 168 **Acknowledgement**

169 This work was supported by the PAHO Health Emergencies Department, by the National Institutes of  
170 Health USA grant U01 AI151698 for the United World Arbovirus Research Network (UWARN),  
171 FAPESP (2021/11944-6) and by Mercosur Structural Convergence Fund (FOCEM), Mercosur,  
172 FOCEM agreement N° 03/11 Project "Research, Education and Biotechnologies Applied to Health  
173 (COF 03/11). Data analysis support was provided by the Centre for Epidemic Response and  
174 Innovation (CERI) at Stellenbosch University supported by the Rockefeller Foundation. Authors  
175 would like to acknowledge the Global Consortium to Identify and Control Epidemics – CLIMADE,  
176 (T.O., L.C.J.A., E.C.H., J.L., M.G.) (<https://climade.health/>). The authors would like to express their  
177 gratitude to the Pan American Health Organization (PAHO/WHO), and in particular to Drs. Marcelo  
178 Korc, Alexander Rosewell, and Rodrigo Stabeli, for their significant contribution and assistance  
179 during this project. Because the journal had already achieved its limit for the number of writers, we  
180 were unable to include them on the paper as co-authors.

181

## 182 **Author contributions**

183 Conception and design: M.G., C.V., J.L., J.M.R., L.C.J.A.; Investigations: M.G., C.V., M.L., E.C.,  
184 A.R., A.G.d.I.F., C.A., C.C., F.F., J.T., J.B., M.J.O., M.L.G., S.V., T.A., J.X., T.A., H.F., F.C.M.I.,  
185 C.d.O., G.S., E.S.R., S.K., J.L., L.G., L.F., H.T., R.L., A.M.B.d.F., A.O., G.S., R.M., M.K., E.C.H.,  
186 T.d.O., J.M.R., J.L., V.F., and L.C.J.A; Data Analysis: M.G., H.T., J.L. and V.F.; Writing – Original:  
187 M.G., J.L., and L.C.J.A.; Revision: M.G., C.V., M.L., E.C., A.R., A.G.d.I.F., C.A., C.C., F.F., J.T.,  
188 J.B., M.J.O., M.L.G., S.V., T.A., J.X., T.A., H.F., F.C.M.I., C.d.O., G.S., E.S.R., S.K., J.L., L.G.,

189 L.F., H.T., R.L., A.M.B.d.F., A.O., G.S., R.M., M.K., E.C.H., T.d.O., J.M.R., J.L., V.F., and L.C.J.A;  
190 Resources: C.V., J.M.R., and L.C.J.A.

191

## 192 **Figure legends**

193 **Figure 1. Spatial and temporal distribution of CHIKV cases in Paraguay.** A) Temperature trends  
194 in Paraguay between 1981 and 2022. The yearly mean (red full line), yearly minimum and maximum  
195 (grey full lines), yearly 50% quantiles (dark grey area) and min, max and mean temperature in 1981  
196 (dashed grey and red lines, respectively) are shown; B) Map of Paraguay showing the number of  
197 CHIKV genome sequences by departments. The size of the circles indicates the number of new  
198 genomes generated in this study; C) Weekly notified chikungunya cases (grey), incidence normalized  
199 per 100 K individuals (blue) and cumulative deaths (green) in 2022-2023 (until EW11), red bars at the  
200 bottom highlight the dates of sample collection of the genomes generated in this study; D) Boxplot of  
201 the patient's (representing the study population) age and clinical outcomes value distribution. The  
202 Kruskal-Wallis non-parametric approach was used to determine the strength of association within the  
203 different clinical outcomes. E) Time-resolved maximum likelihood tree including the newly complete  
204 genome sequence from Paraguay (n=179) generated in this study combined with publicly available  
205 sequences (n=715) from GenBank collected up to March 30, 2023. Colors indicate geographic  
206 location of sampling. Support for branching structure is shown by bootstrap values at key nodes.

207

208 **Figure 2. Expansion of the CHIKV-ECSA epidemic in Paraguay.** A) Maximum Likelihood (ML)  
209 phylogeny constructed using n=174 CHIKV genome sequences from the PY clade 2 associated with  
210 the 2022-2023 epidemic. The tips were colored based on the clinical outcomes. Neurological and  
211 neonatal cases have been highlighted in the tree using blue and red borders, respectively. The length  
212 of a branch indicates the amount of sequence evolution; B) Regression of root-to-tip genetic distances  
213 and sampling dates estimated using TempEst v.1.5.3, buffers (shaded area) representing 90%  
214 confidence intervals. Colors indicate geographic location of sampling; C) Spatiotemporal



215 reconstruction of the spread of CHIKV-ECSA in Paraguay. Circles represent nodes of the maximum  
216 clade credibility phylogeny, colored according to their inferred time of occurrence (scale shown).  
217 Shaded areas represent the 80% highest posterior density interval and depict the uncertainty of the  
218 phylogeographic estimates for each node. Solid curved lines denote the links between nodes and the  
219 directionality of movement. Differences in population density are shown on a grey-white scale.

220

221

## 222 **References**

- 223 1. Schwartz O, Albert ML. Biology and pathogenesis of chikungunya virus. *Nat Rev Microbiol.*  
224 2010;8(7):491-500. doi: 10.1038/nrmicro2368. PMID: 20551973.
- 225 2. de Oliveira EC, Fonseca V, Xavier J, Adelino T, Morales Claro I, Fabri A, Marques Macario  
226 E, Viniski AE, Campos Souza CL, Gomes da Costa ES, Soares de Sousa C, Guimarães Dias  
227 Duarte F, Correia de Medeiros A, Campelo de Albuquerque CF, Venancio Cunha R, Oliveira  
228 De Moura NF, Bispo de Filippis AM, Oliveira T, Lourenço J, de Abreu AL, Alcantara LCJ,  
229 Giovanetti M. Short report: Introduction of chikungunya virus ECSA genotype into the  
230 Brazilian Midwest and its dispersion through the Americas. *PLoS Negl Trop Dis.*  
231 2021;16;15(4):e0009290.
- 232 3. Rico-Hesse, R. Molecular evolution and distribution of dengue viruses type 1 and 2 in nature.  
233 *Virology.* 1990; 174(2), 479–493.
- 234 4. Quick J, Grubaugh ND, Pullan ST, Claro IM, Smith AD, Gangavarapu K, et al. Multiplex  
235 PCR method for MinION and Illumina sequencing of Zika and other virus genomes directly  
236 from clinical samples. *Nat Protoc.* 2017;12:1261–76.
- 237 5. Pan-American Health Organization, CHIKV Weekly Report. PAHO. 2023.  
238 <https://www3.paho.org/data/index.php/en/mnu-topics/chikv-en/550-chikv-weekly-en.html>
- 239 6. Pan-American Health Organization, Disease Outbreak News. PAHO. 2023.  
240 <https://www.who.int/emergencies/disease-outbreak-news/item/2023->

- 241 DON448#:~:text=Paraguay%3A%20Between%20%20October%202022,hospitalized%20  
242 cases%20and%2046%20deaths.
- 243 7. Yoon IK, Alera MT, Lago CB, Tac-An IA, Villa D, Fernandez S, Thaisomboonsuk B,  
244 Klungthong C, Levy JW, Velasco JM, Roque VG Jr, Salje H, Macareo LR, Hermann LL,  
245 Nisalak A, Srikiatkachorn A. High rate of subclinical chikungunya virus infection and  
246 association of neutralizing antibody with protection in a prospective cohort in the  
247 Philippines. *PLoS Negl Trop Dis.* 2015; 7;9(5):e0003764. doi:  
248 10.1371/journal.pntd.0003764. PMID: 25951202; PMCID: PMC4423927.
- 249 8. Gräf T, Vazquez C, Giovanetti M, de Bruycker-Nogueira F, Fonseca V, Claro IM, de Jesus  
250 JG, Gómez A, Xavier J, de Mendonça MCL, Villalba S, Torales J, Gamarra ML, Thézé J,  
251 de Filippis AMB, Azevedo V, de Oliveira T, Franco L, de Albuquerque CFC, Irala S,  
252 Holmes EC, Méndez Rico JA, Alcantara LCJ. *Epidemiologic History and Genetic  
253 Diversity Origins of Chikungunya and Dengue Viruses, Paraguay.* *Emerg Infect Dis.* 2021;  
254 27(5):1393-1404.
- 255 9. Faure, G., Ogurtsov, A.Y., Shabalina, S.A., and Koonin, E.V. Adaptation of mRNA  
256 structure to control protein folding. *RNA Biol.* 2017; 14, 1649–1654.
- 257 10. Sharma Y, Miladi M, Dukare S, Boulay K, Caudron-Herger M, Groß M, Backofen R,  
258 Diederichs S. A pan-cancer analysis of synonymous mutations. *Nat Commun.* 2019;  
259 12;10(1):2569.

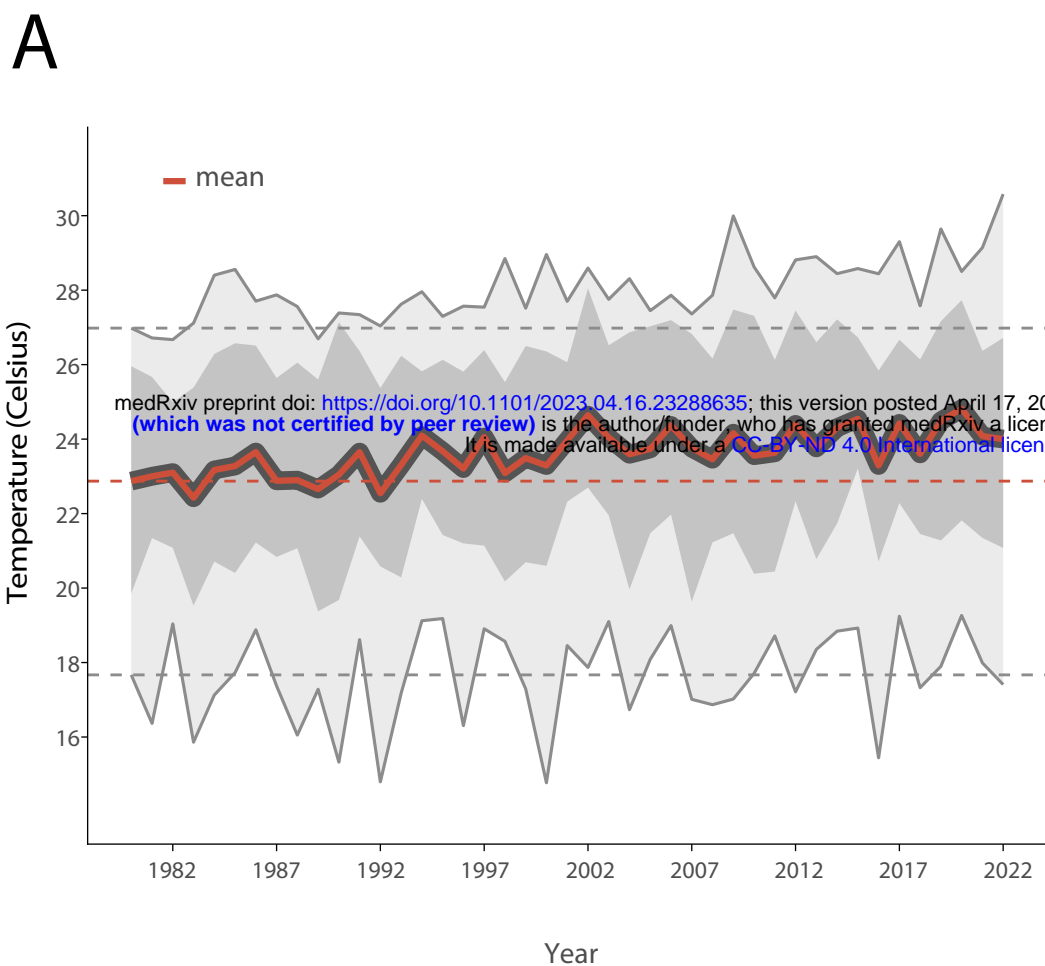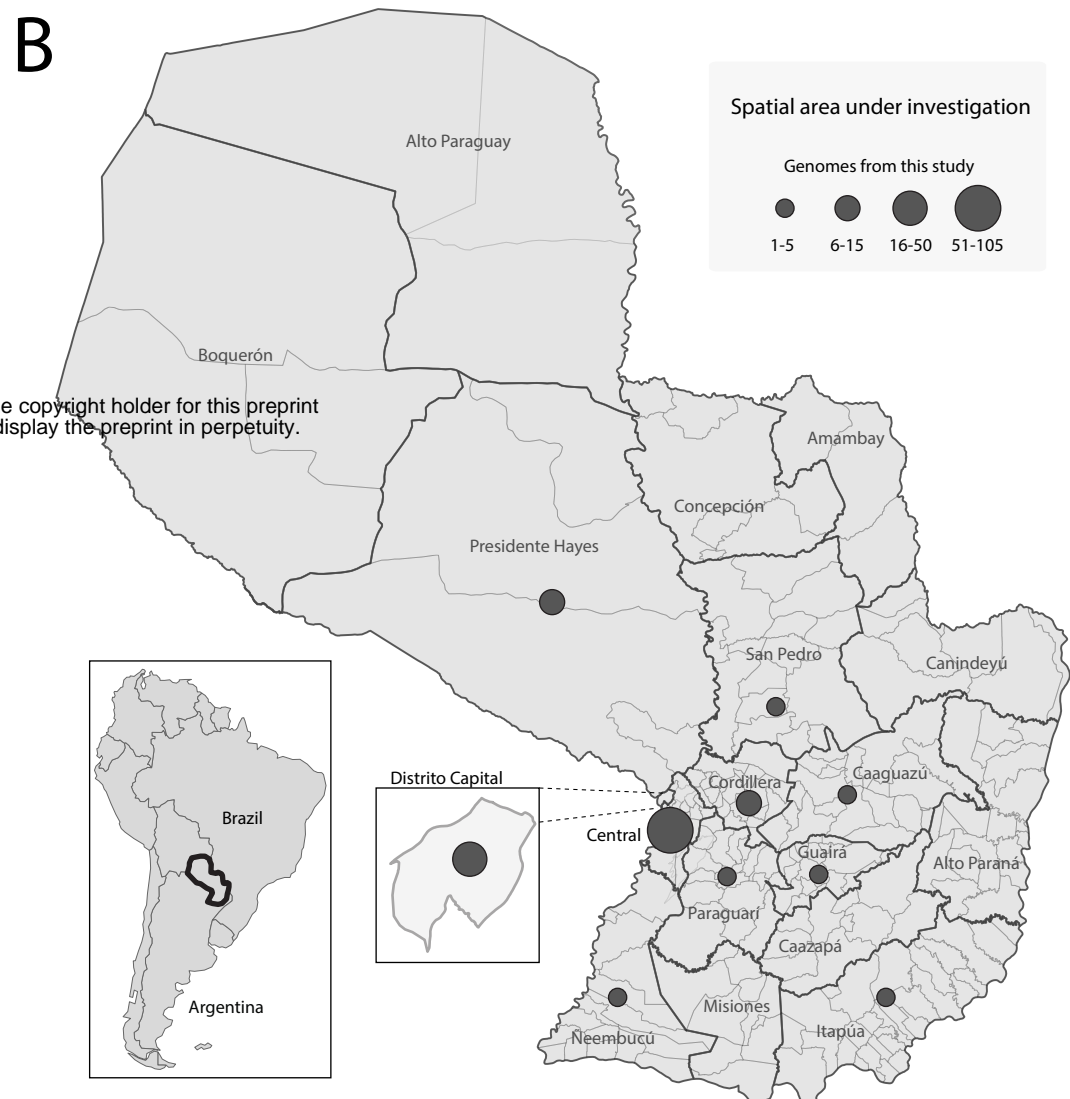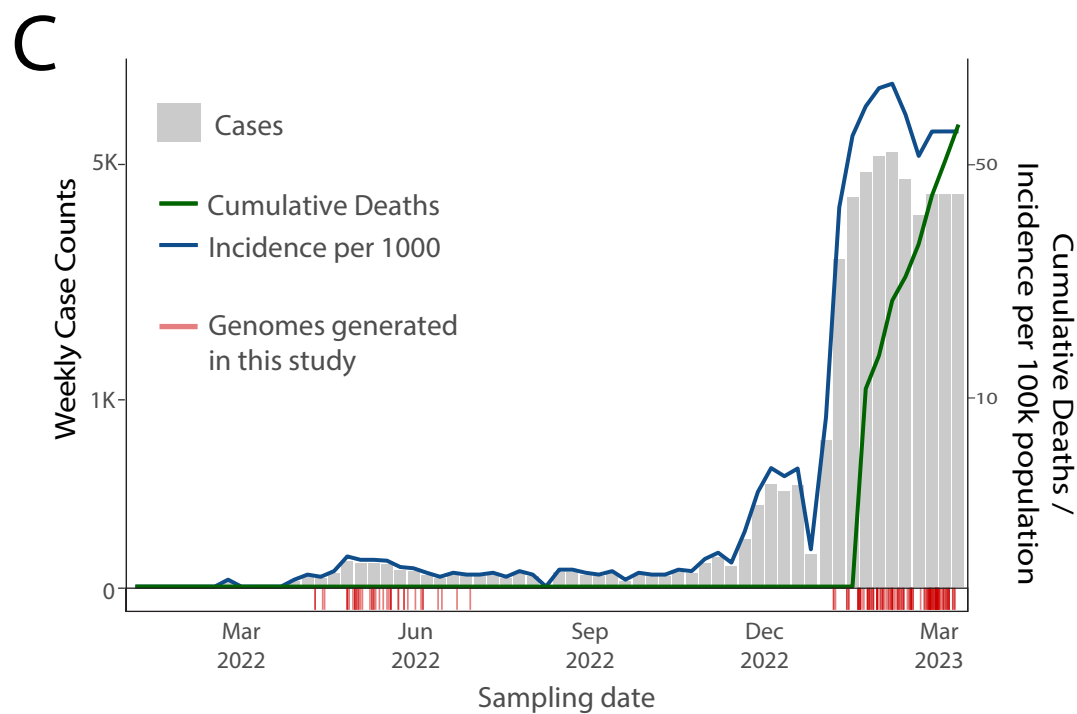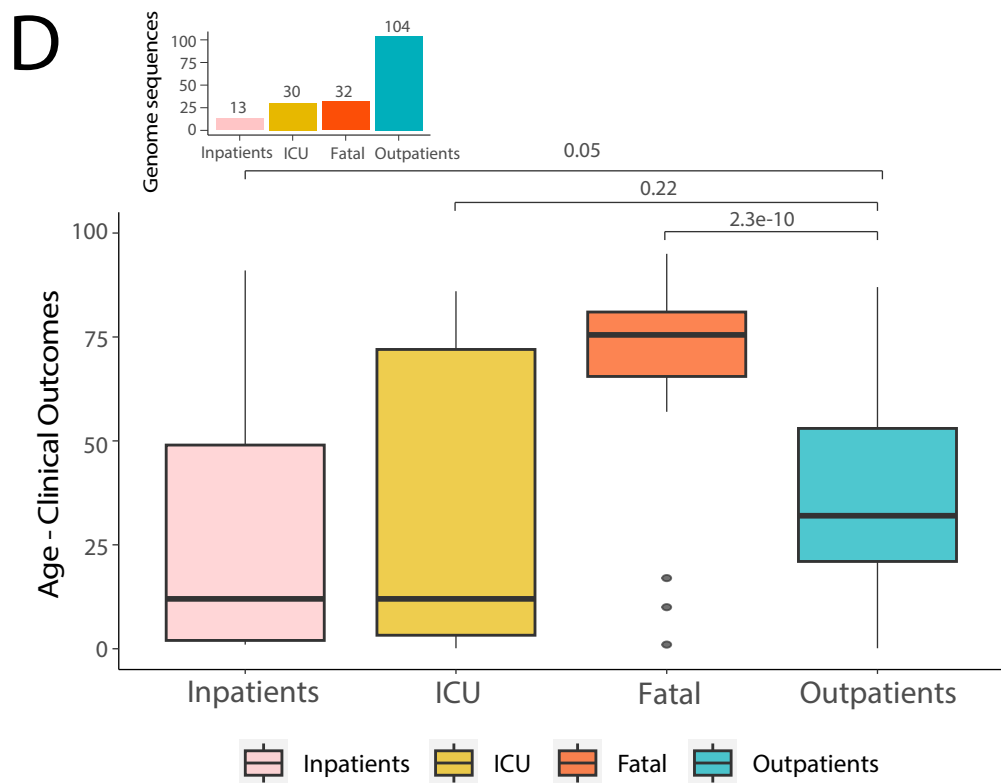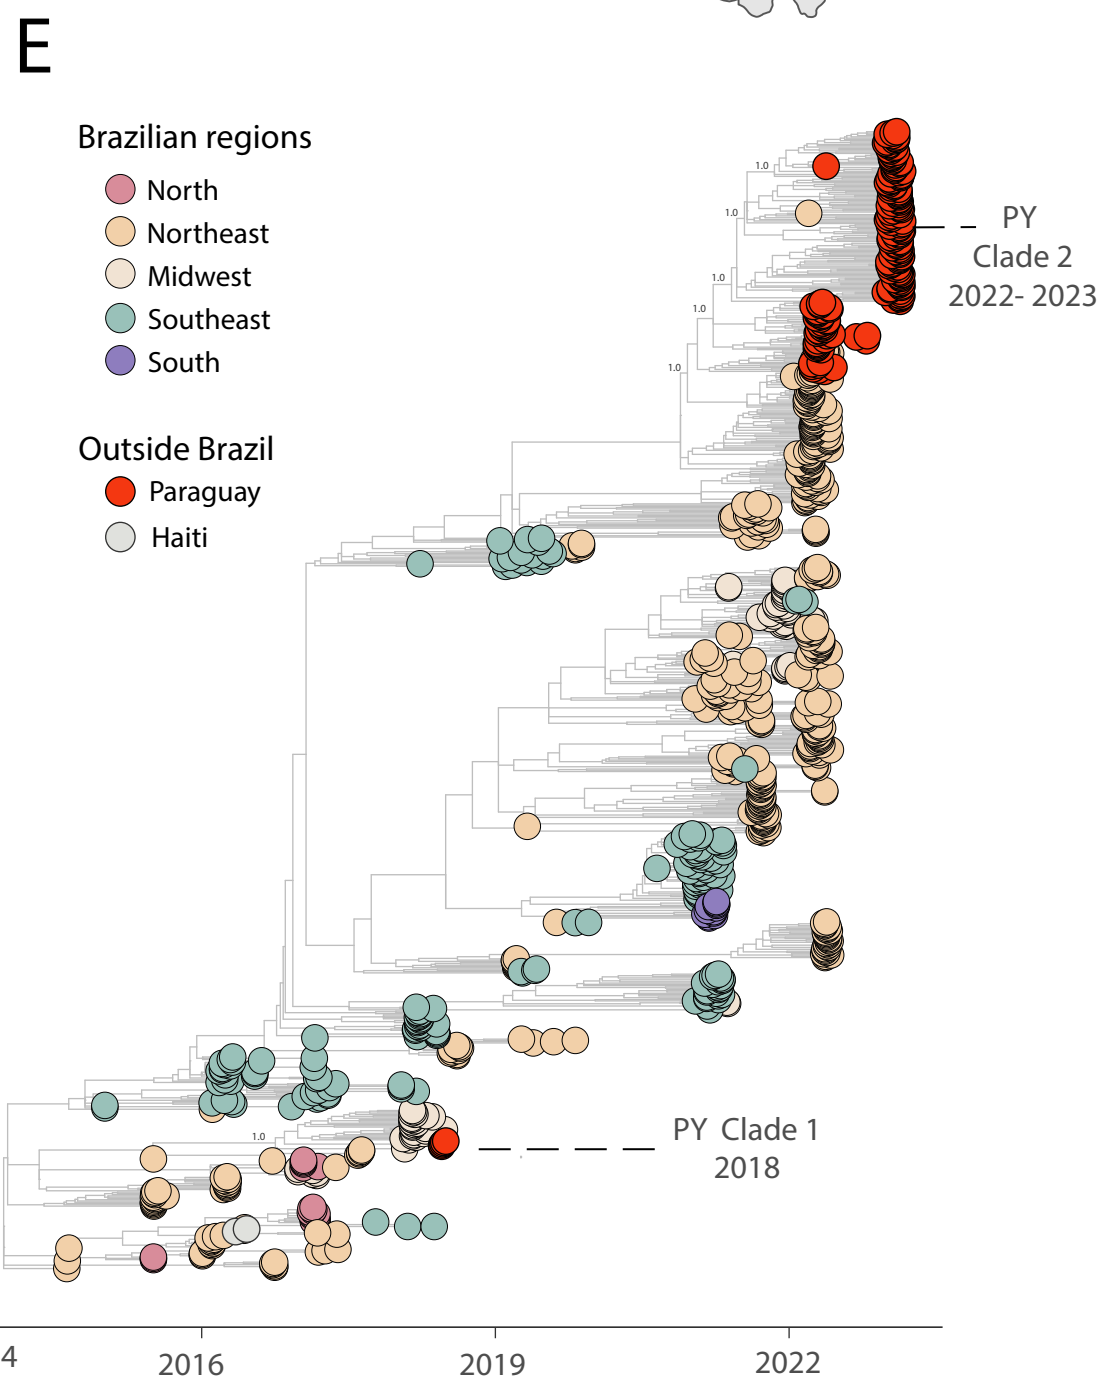

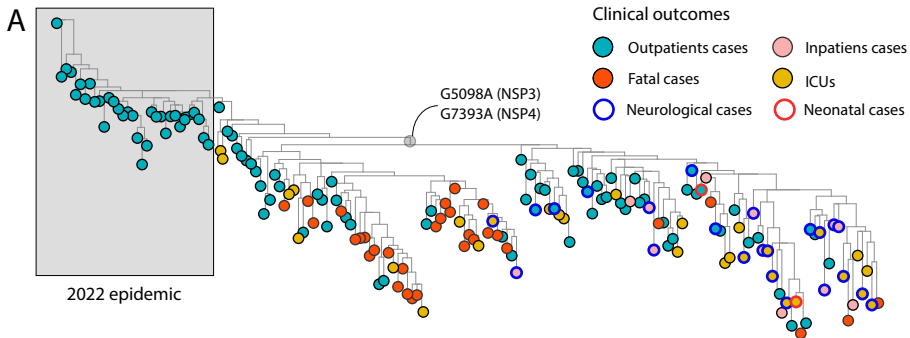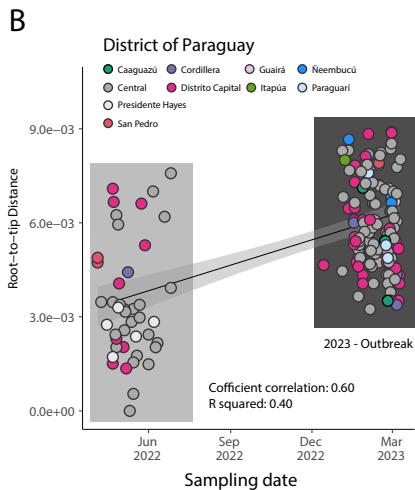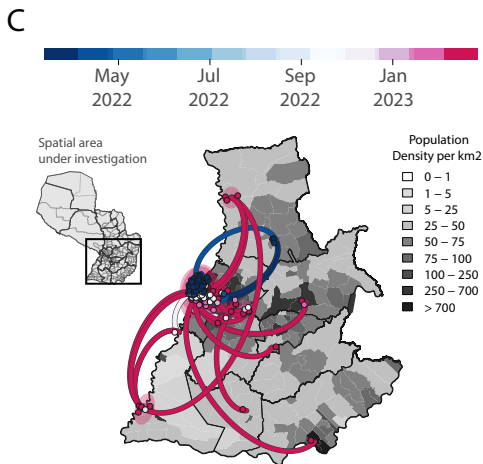

Source: https://medrxiv.org/content/medrxiv/early/2023/04/17/2023.04.16.23288635.full.pdf
